# Supplementary material
Source: PubMed Central journal article supplement (PMC10712428)
Supplement: NIHMS1947692-supplement-Supplementary_material.pdf [file NIHMS1947692-supplement-Supplementary_material.pdf]

1  
2  
3  
4  
5  
  
6  
7  
8  
9  
10  
11  
12  
13  
14  
15  
16  
17  
18  
19  
20  
  
21  
22  
23  
  
24  
  
25  
26  
27  
28

Supplementary information for:

Negative durotaxis: cell movement toward softer environments

Aleksi Isomursu<sup>1,†</sup>, Keun-Young Park<sup>2,†</sup>, Jay Hou<sup>3,†</sup>, Bo Cheng<sup>4,5,†</sup>, Mathilde Mathieu<sup>1</sup>, Ghaidan Shamsan<sup>3</sup>, Benjamin Fuller<sup>3</sup>, Jesse Kasim<sup>3</sup>, M. Mohsen Mahmoodi<sup>2</sup>, Tian Jian Lu<sup>6,7</sup>, Guy M. Genin<sup>4,5,8</sup>, Feng Xu<sup>4,5</sup>, Min Lin<sup>4,5,\*</sup>, Mark Distefano<sup>2,\*</sup>, Johanna Ivaska<sup>1,9,10,\*</sup>, and David J. Odde<sup>3,\*</sup>

<sup>1</sup>Turku Bioscience Centre, University of Turku and Åbo Akademi University, 20520 Turku, Finland

<sup>2</sup>Department of Chemistry, University of Minnesota, Minneapolis 55455, MN, USA

<sup>3</sup>Department of Biomedical Engineering, University of Minnesota, Minneapolis 55455, MN, USA

<sup>4</sup>The Key Laboratory of Biomedical Information Engineering of Ministry of Education, School of Life Science and Technology, Xi'an Jiaotong University, Xi'an 710049, P.R. China

<sup>5</sup>Bioinspired Engineering and Biomechanics Center (BEBC), Xi'an Jiaotong University, Xi'an 710049, P.R. China

<sup>6</sup>State Key Laboratory of Mechanics and Control of Mechanical Structures, Nanjing University of Aeronautics and Astronautics, Nanjing 210016, P.R. China

<sup>7</sup>MOE Key Laboratory of Multifunctional Materials and Structures, Xi'an Jiaotong University, Xi'an 710049, P.R. China

<sup>8</sup>NSF Science and Technology Center for Engineering Mechanobiology, Washington University in St. Louis, St. Louis 63130, MO, USA

<sup>9</sup>Department of Life Technologies, University of Turku, 20520 Turku, Finland

<sup>10</sup>InFlames Research Flagship Center, University of Turku, 20520 Turku, Finland

<sup>†</sup>These authors have contributed equally to the work

\*Correspondence to: oddex002@umn.edu (D.J.O.); johanna.ivaska@utu.fi (J.I.); diste001@umn.edu (M.D.); minlin@xjtu.edu.cn (M.L.)

This file includes:

- Figures S1–S15
- Supplementary Texts 1–3
- Tables S1–S3
- Captions for Movies S1–S3

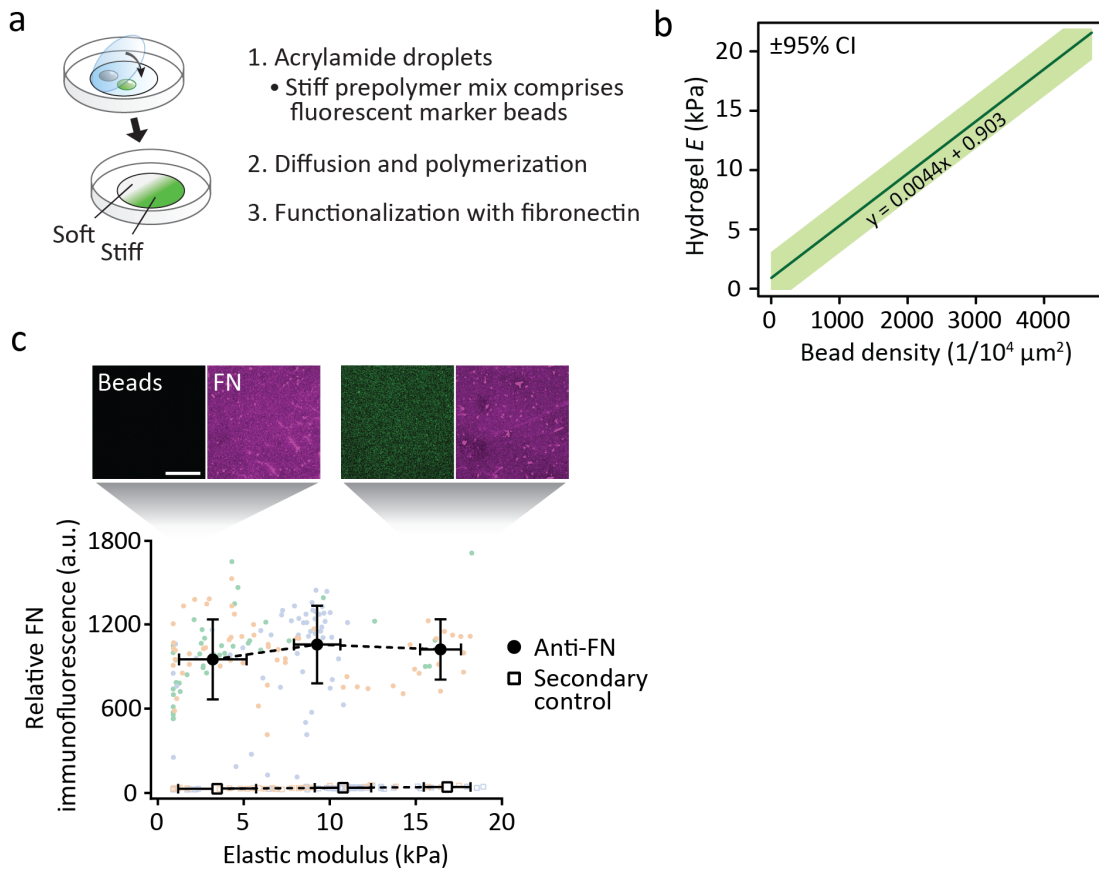

29

30 Figure S1. Preparation of diffusion-based stiffness gradient hydrogels. (a) Schematic  
31 representation of stiffness gradient preparation. Two acrylamide solutions are polymerized and  
32 mixed together on a glass bottom dish to create a continuous gradient in the range of 0.5–22  
33 kPa. The hydrogel is activated and functionalized with fibronectin before use. (b) Calibration  
34 curve connecting fluorescent marker bead density, measured using a confocal microscope, to the  
35 elastic modulus of the hydrogel. Adapted from Ref.<sup>31</sup> (c) Fibronectin density across the stiffness  
36 gradient hydrogels, measured via immunofluorescence. Green, orange and blue colors denote  
37 measurements from three individual experiments, overlaid with binned data. Squares depict  
38 measurements from secondary controls, stained by omitting the anti-fibronectin antibody. Mean  
39  $\pm$  SD of  $n = 19\text{--}86$  (anti-FN) or  $9\text{--}42$  (control) regions of interest (ROIs).

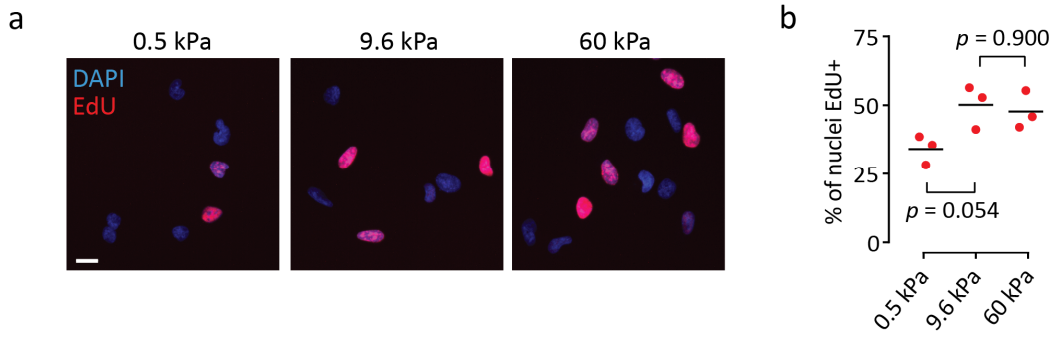

40

41 Figure S2. Mechanosensitivity of U-251MG proliferation. (a–b) Fluorescence images (a) and  
42 quantification (b) depicting EdU incorporation by U-251MG cells on 0.5–60 kPa substrates. Scale  
43 bar, 20  $\mu$ m. Mean values from three independent experiments. Analyzed by one-way ANOVA and  
44 Sidak's *post hoc* test.

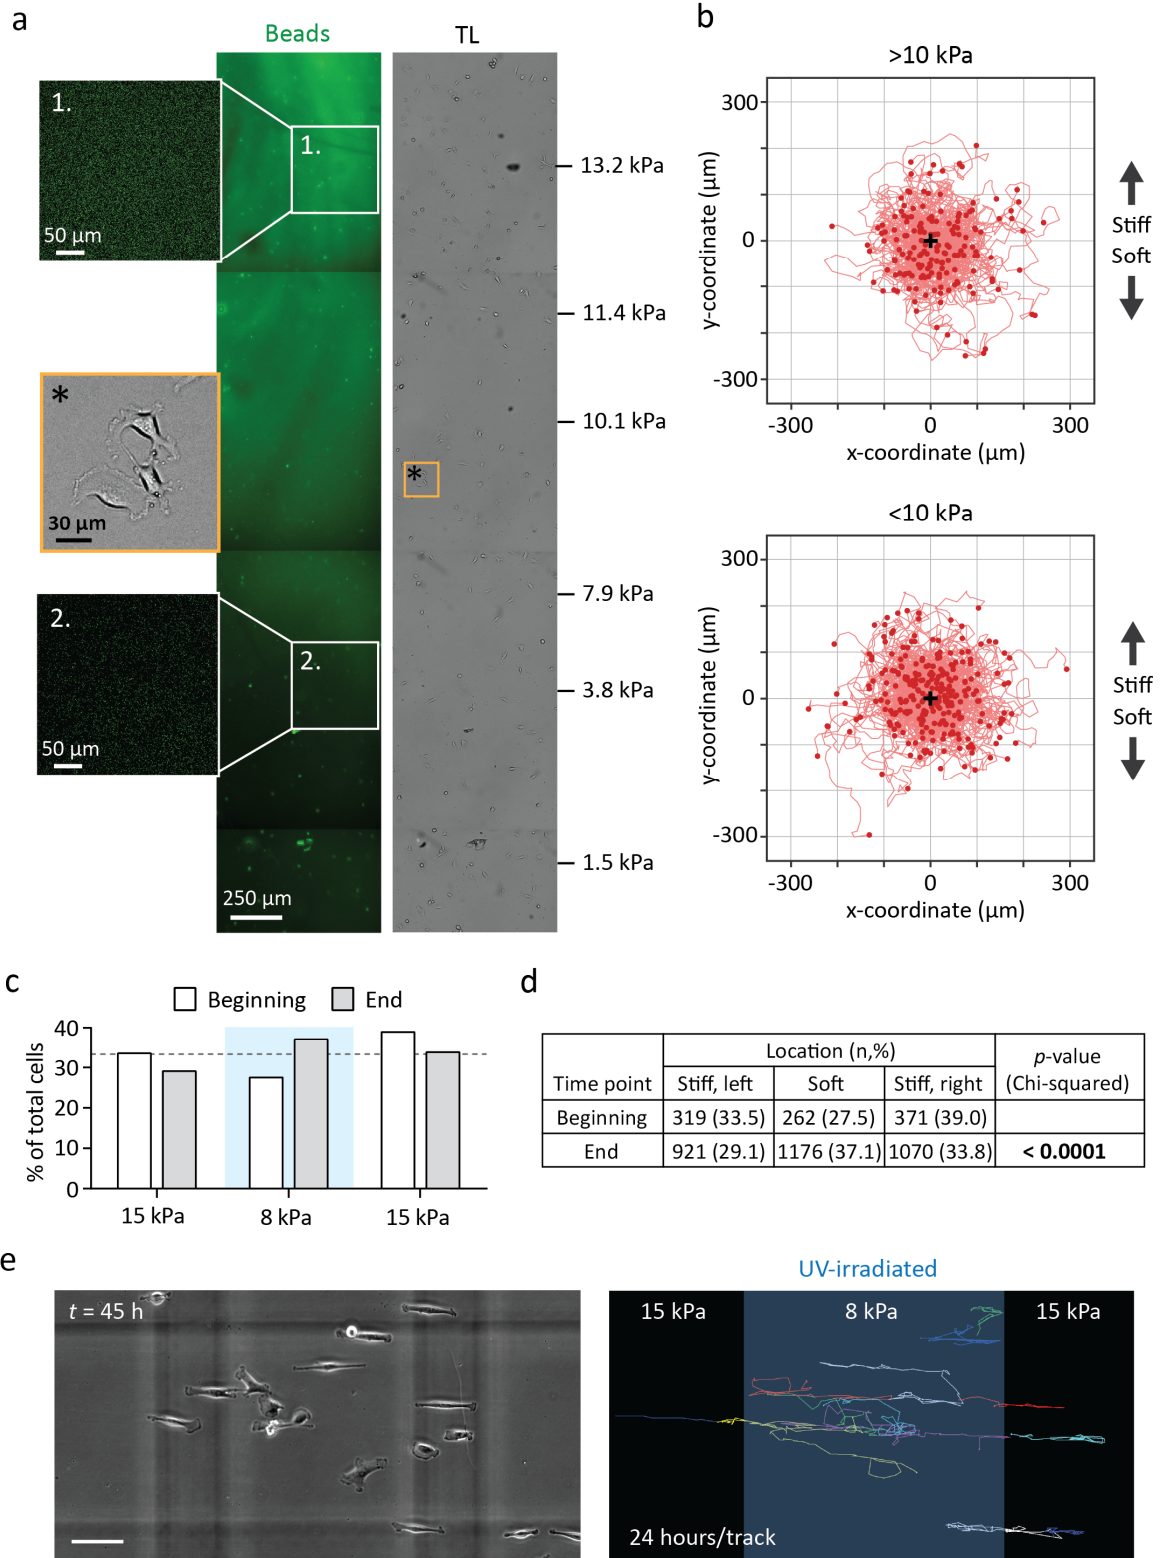



46 Figure S3. Tracking individual U-251MG cells on stiffness gradients. (a) Representative  
47 fluorescence image of a stiffness gradient hydrogel (left) and live U-251MG cells adhering to the  
48 substrate (right). (Insets 1, 2) Example confocal images of fluorescent beads, acquired as  
49 described in Ref.<sup>31</sup> The images correspond to the indicated gradient regions and were used for  
50 calculating the substrate elastic moduli. (\*) Close up of the cells. (b) Tracks from individual U-  
51 251MG cells migrating on the stiffer (>10 kPa, top) and softer (<10 kPa, bottom) regions of a 0.5–  
52 22 kPa stiffness gradient for 10 hours. The tracks correspond to the data in Fig. 1d and the origo  
53 (0, 0) is highlighted by a black (+). n = 174–264 cells per condition, from three independent  
54 experiments. (c–d) Total number of cells in the different gradient regions in Fig. 1f–g. (c) Bar  
55 graph, n = 952–3,167 cells per time point, from two individual experiments. (d) Contingency table  
56 summarizing the data, analyzed by chi-squared test. (e) Endpoints (left) and 24-hour tracks (right)  
57 depicting the migration of individual cells on the photoresponsive stiffness gradients. Scale bar,  
58 100  $\mu\text{m}$ .

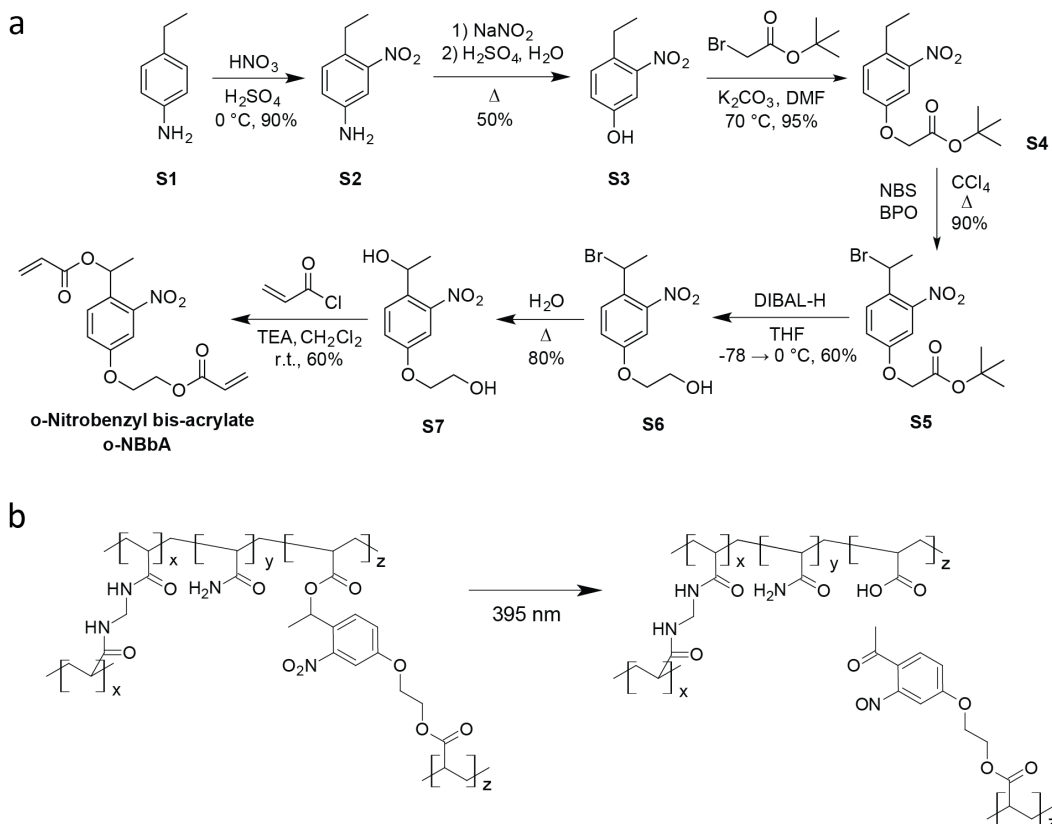

59

60 Figure S4. Synthesis and photochemistry of o-nitrobenzyl bis-acrylate. (a) Schematic of the  
 61 synthesis of o-NBbA. (b) Copolymerization of o-NBbA with acrylamide and bis-acrylamide yields  
 62 hydrogels composed of strands of polyacrylamide crosslinked by either o-NBbA or bis-  
 63 acrylamide. UV irradiation cleaves the photolabile o-NBbA, resulting in gels with lower  
 64 crosslinking density and hence lower stiffness. The process does not release any byproducts to  
 65 the gel environment.

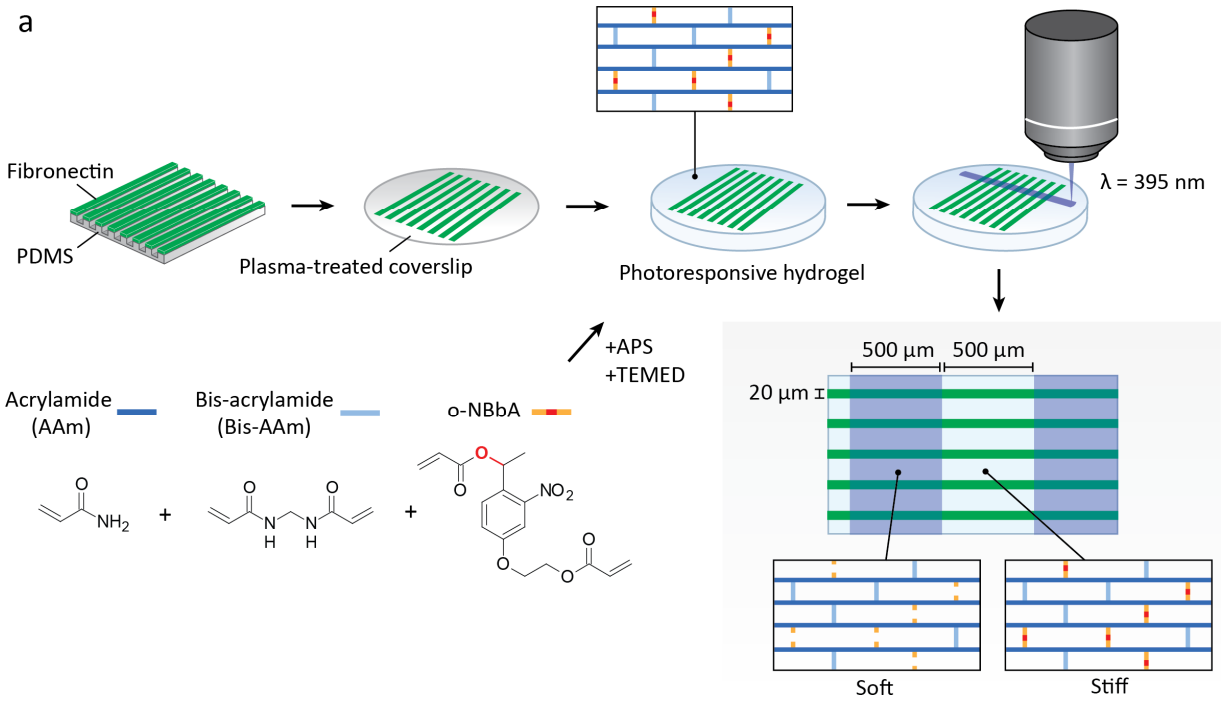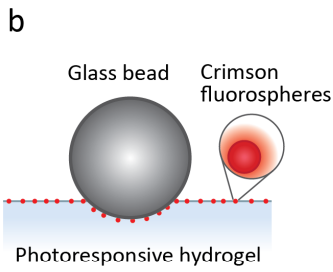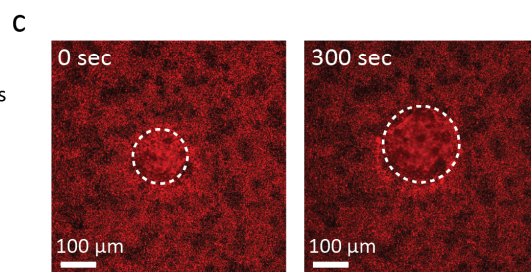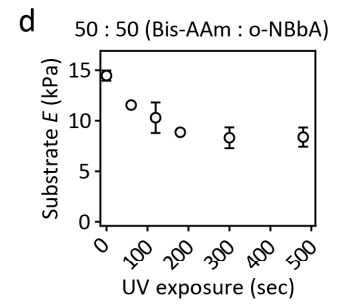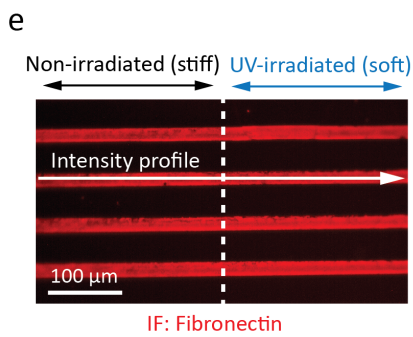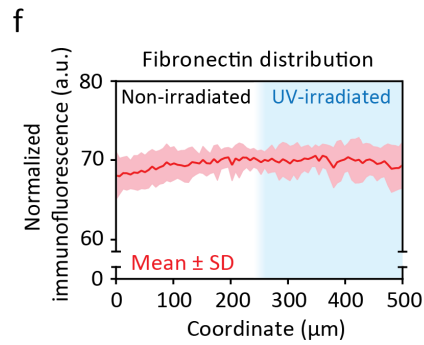

67 Figure S5. Preparation and characterization of photoresponsive hydrogels. (a) Schematic  
68 representation of stiffness gradient preparation for migration experiments. The photocleavable  
69 carbon-oxygen bond in o-NBbA is indicated by red color. **(b–d)** Stiffness characterization by bead  
70 indentation. A schematic representation of the technique (b), representative fluorescence  
71 images (c) and quantified results (d) depicting hydrogel elasticity as a function of UV exposure.  
72 Dashed lines highlight indented, out-of-focus areas in the gel. Mean  $\pm$  SD of n = 3 measurements.  
73 **(e–f)** Validation of the microcontact printed fibronectin patterns. Immunofluorescence image (e)  
74 and quantification (f) showing fibronectin distribution on non-irradiated and UV-exposed regions  
75 of the hydrogel. Mean  $\pm$  SD of n = 24 intensity profiles.

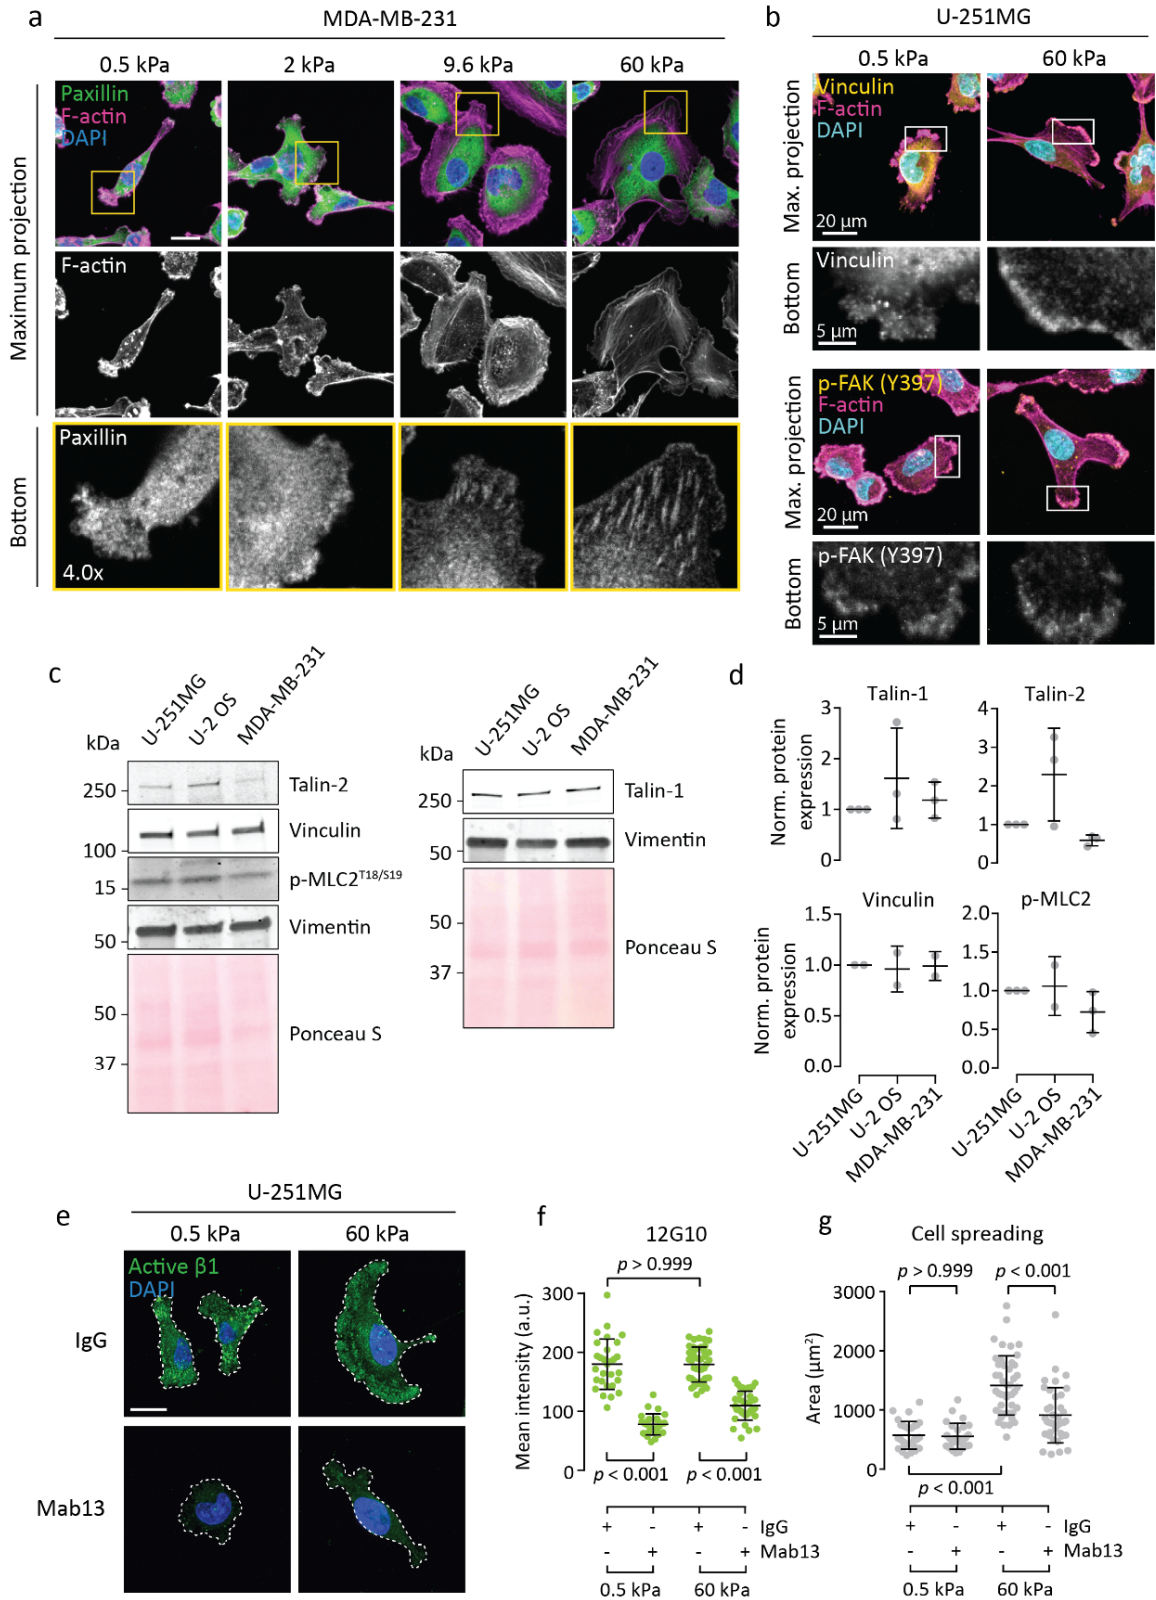

77 Figure S6. Focal adhesion maturation and adhesion components in U-251MG and other cancer  
78 cells. (a) Immunofluorescence images of paxillin and F-actin in MDA-MB-231 cells on 0.5–60 kPa  
79 substrates. The bottom panels show individual focal planes from confocal stacks, corresponding  
80 to the basal side of each cell. Scale bar, 20  $\mu$ m. (b) Immunofluorescence images of vinculin (top),  
81 p-FAK (bottom) and F-actin in U-251MG cells on 0.5 and 60 kPa substrates. The bottom panels  
82 show individual focal planes from confocal stacks, corresponding to the basal side of each cell.  
83 (c–d) Representative western blots (c) and quantification (d) depicting talin-1/2, vinculin and p-  
84 MLC2 levels across three different cell lines. Densitometric measurements were normalized to  
85 vimentin, mean  $\pm$  SD of 2–3 independent experiments. (e–f) Immunofluorescence images (e) and  
86 quantification (f) showing active  $\beta$ 1-integrin (clone 12G10) in U-251MGs on 0.5 and 60 kPa  
87 substrates. The cells were treated with a control antibody (normal rat IgG) or  $\beta$ 1 function-  
88 blocking Mab13 for two hours before fixation. Scale bar, 20  $\mu$ m. Mean  $\pm$  SD of n = 27–45 cells,  
89 analyzed by Kruskal-Wallis one-way ANOVA and Dunn's *post hoc* test. Representative of two  
90 independent experiments. (g) Spreading of U-251MGs on 0.5 and 60 kPa substrates, without or  
91 after  $\beta$ 1-integrin blocking by Mab13. Mean  $\pm$  SD of n = 27–45 cells, analyzed by Kruskal-Wallis  
92 one-way ANOVA and Dunn's *post hoc* test. Representative of two independent experiments.

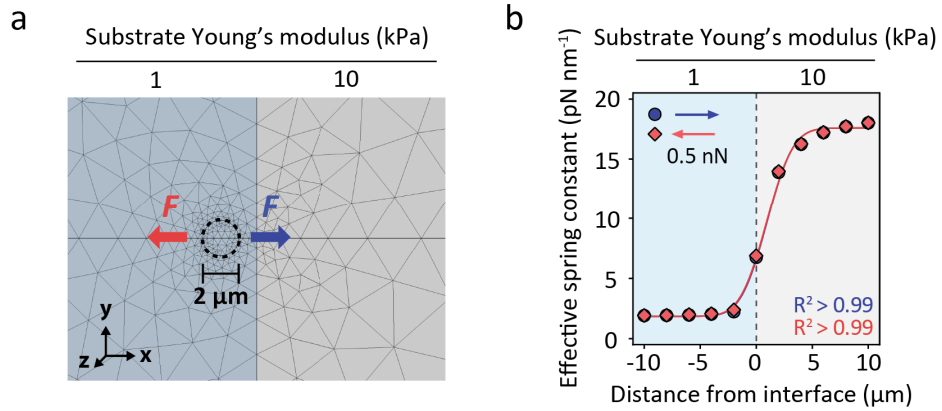

93

94 Figure S7. Finite element analysis of polyacrylamide displacement next to a stepwise elastic  
95 gradient. (a) COMSOL Multiphysics® model setup (b) The effect of steep elastic gradients on the  
96 effective spring constant of polyacrylamide. A lateral 0.5 nN force was exerted on the substrate  
97 through a circular adhesion zone ( $r = 1 \mu\text{m}$ ) as shown in (a). The position of the adhesion zone  
98 was adjusted repeatedly at  $2 \mu\text{m}$  steps. The direction of the force was varied by  $180^\circ$  but was  
99 always parallel to the gradient. In both cases, normal cumulative distribution function was a good  
100 fit to the data.

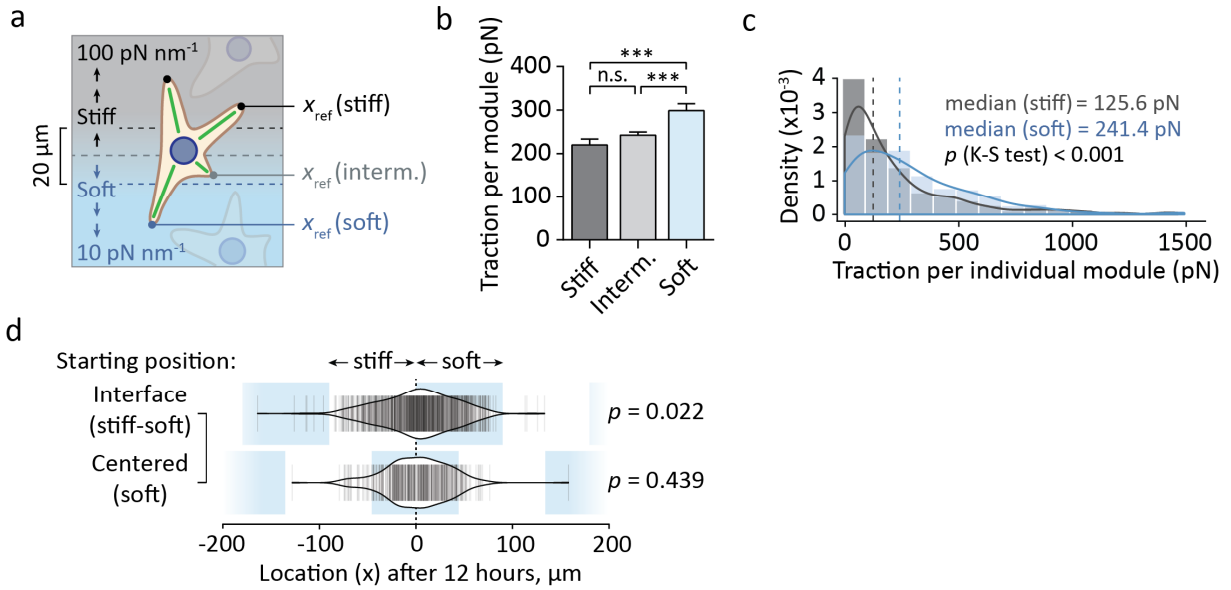

101

102 Figure S8. CMS produces asymmetric traction forces in cells that interact with stiffness  
 103 gradients. (a) When individual cells were on top of a stiffness gradient during the simulations in  
 104 Fig. 3b–f, their traction forces were recorded. (b–c) Forces exerted by clutch modules on stiff,  
 105 intermediate and soft substrate, while the cell body is located on a stiffness gradient. (b) Bar  
 106 graphs depicting mean ± SEM of n = 292–1380 modules. \*\*\*p < 0.001, n.s. = not significant,  
 107 Kruskal-Wallis one-way ANOVA and Dunn's *post hoc* test. (c) Histograms overlaid with probability  
 108 density functions, dashed lines indicate medians. n = 292–365 modules, analyzed by Kolmogorov-  
 109 Smirnov test. (d) Violin plots of accumulated distance migrated by individual cells along the  
 110 orientation of the gradient and over 12 hours, starting from a gradient (top) or from the middle  
 111 of a compliant region (bottom). n = 326–759 cells, analyzed by sign test.



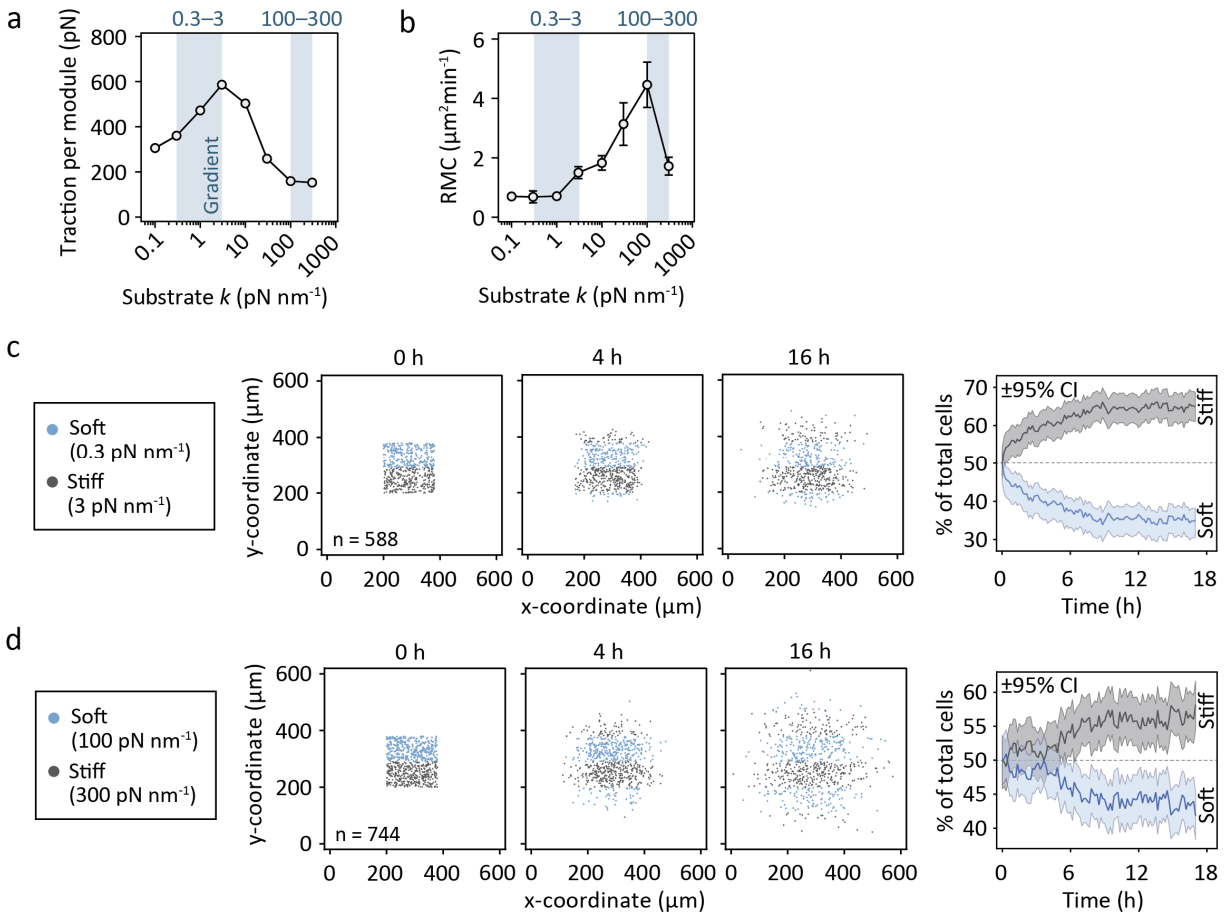

112

113 Figure S9. Modifying the range of the stiffness gradient can reverse durotaxis *in silico*. (a–b)  
 114 Module traction forces (a) and RMC (b) of the simulated cells as a function of substrate stiffness,  
 115 as in Fig. 3c–d. Overlays highlight the ranges of the 0.3–3  $\text{pN nm}^{-1}$  and 100–300  $\text{pN nm}^{-1}$  gradients  
 116 in (c–d). Mean  $\pm$  SEM of  $n = 10$  cells. (c–d) Evolution of cell density on mechanically  
 117 heterogeneous substrates over time. (c) Coordinates of individual cells on the 0.3–3  $\text{pN nm}^{-1}$   
 118 gradient 0, 4 and 16 hours into the simulation (left) and the fraction of cells residing in the stiffer  
 119 and softer areas over the course of the simulation (right).  $\pm 95\%$  CI,  $n = 588$  cells. (d) As above,  
 120 but for the 100–300  $\text{pN nm}^{-1}$  gradient.  $n = 744$  cells.

Isomursu et al., Figure S10.

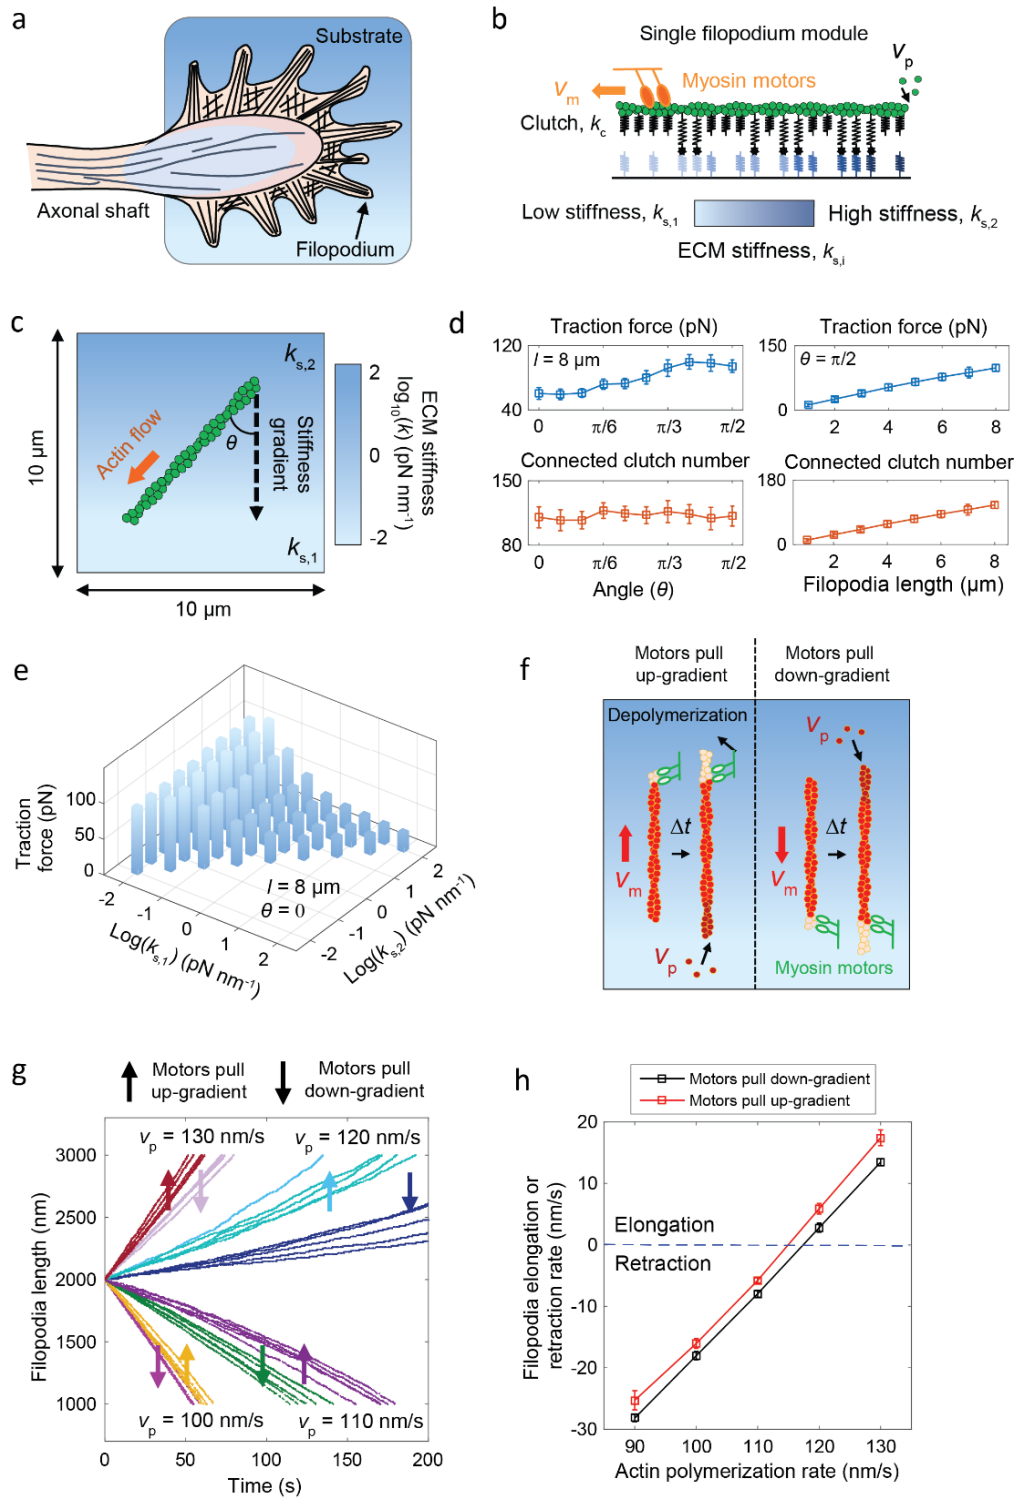

122 Figure S10. Motor-clutch model of filopodial dynamics. (a) Schematic representation of a  
123 neuronal GC. Filopodia, surrounded by a less polarized actin network, reside in the peripheral  
124 domain. They are separated from the axon by a thin transitional domain, and a central domain  
125 (light blue) that is primarily composed of microtubules. (b) The filopodia in GCs are modeled as  
126 individual motor-clutch modules, with adhesion springs (homogeneous stiffness), substrate  
127 springs (heterogeneous stiffness) and inward actin flow resulting from active myosin motors.  
128 Actin monomers are added into the filaments at a constant rate. (c) Setup used in the single-  
129 filopodium simulations. The filopodium interacts with the substrate in a set orientation relative  
130 to the linear stiffness gradient. (d) (Left) Traction force exerted by the filopodium increases when  
131 the protrusion is pointing down the gradient, toward softer substrate. (Right) Perpendicular to  
132 the gradient, traction increases with filopodia length mainly due to more clutches being available  
133 to bind with the substrate. Data shown are from  $n = 10$  independent simulations. (e) Average  
134 traction exerted by a single filopodium on different substrate stiffness gradients. Data represent  
135 means of  $n = 10$  simulations. (f) Filopodia length is affected by both actin flow,  $v_m$ , and the  
136 polymerization rate,  $v_p$ . Depending on the orientation of the filopodium, the actin may flow  
137 toward soft (filopodium pointing up the gradient) or stiff (filopodium pointing down the gradient)  
138 substrate. (g) Evolution of filopodia length on stiffness gradients upon different actin  
139 polymerization rates. The different combinations of  $v_p$  and filopodia orientation are color-coded,  
140 while each line represents the temporal variation in the length of a single filopodium. (h) Effect  
141 of actin polymerization and orientation relative to a stiffness gradient on the filopodia  
142 elongation/retraction rate. Mean  $\pm$  SEM in (d) and (h).

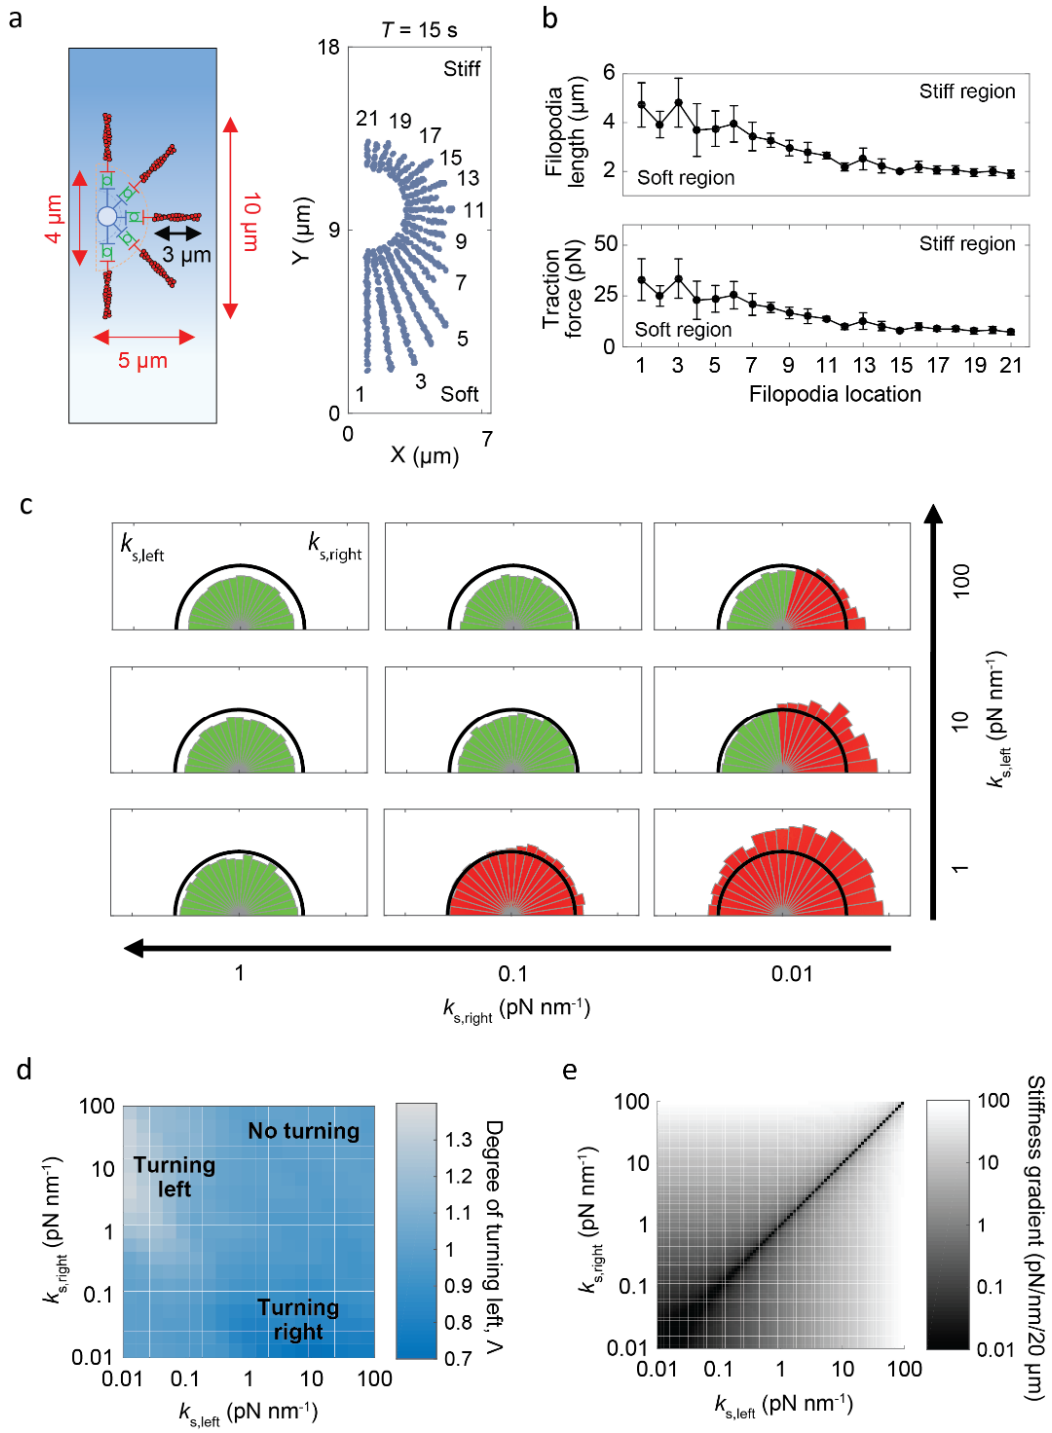

144 Figure S11. Motor-clutch model predicts growth cone steering toward soft matrix. (a)  
145 Schematic representation of the GC model. (Left) Dimensions of a newly initialized GC. (Right)  
146 Each GC consists of multiple filopodia, distributed between  $-\pi/2$  and  $\pi/2$  relative to the axon. On  
147 stiffness gradients ( $k_{s,1} = 0.01 \text{ pN nm}^{-1}$ ,  $k_{s,2} = 100 \text{ pN nm}^{-1}$ ), filopodia on the more compliant side  
148 of the substrate rapidly outgrow the others, leading to effective turning of the GC. (b) Filopodia  
149 length (top) and traction (bottom) based on their orientation around the GC central domain. On  
150 stiffness gradients, filopodia pointing toward the softer substrate elongate faster and generate  
151 more traction. Data shown are from  $n = 10$  independent simulations. (c) Examples of GC behavior  
152 on different stiffness gradients. Green denotes filopodia that are retracting during the course of  
153 the simulation, red denotes filopodia that are elongating. Depending on the gradient, individual  
154 GCs may retract or enlarge isotropically, or steer toward the softer substrate. Displayed are  
155 means of  $n = 10$  simulations. (d) Phase diagram of GC turning to left,  $\Delta$ , on different mechanically  
156 graded substrates. (e) Phase diagram depicting the strength of the stiffness gradient for varying  
157  $k_{s,1}$  and  $k_{s,2}$ . Gradient strength alone cannot explain the magnitude of  $\Delta$ , if the whole substrate  
158 is stiffer than the optimal range for individual filopodia (Fig. S7e).

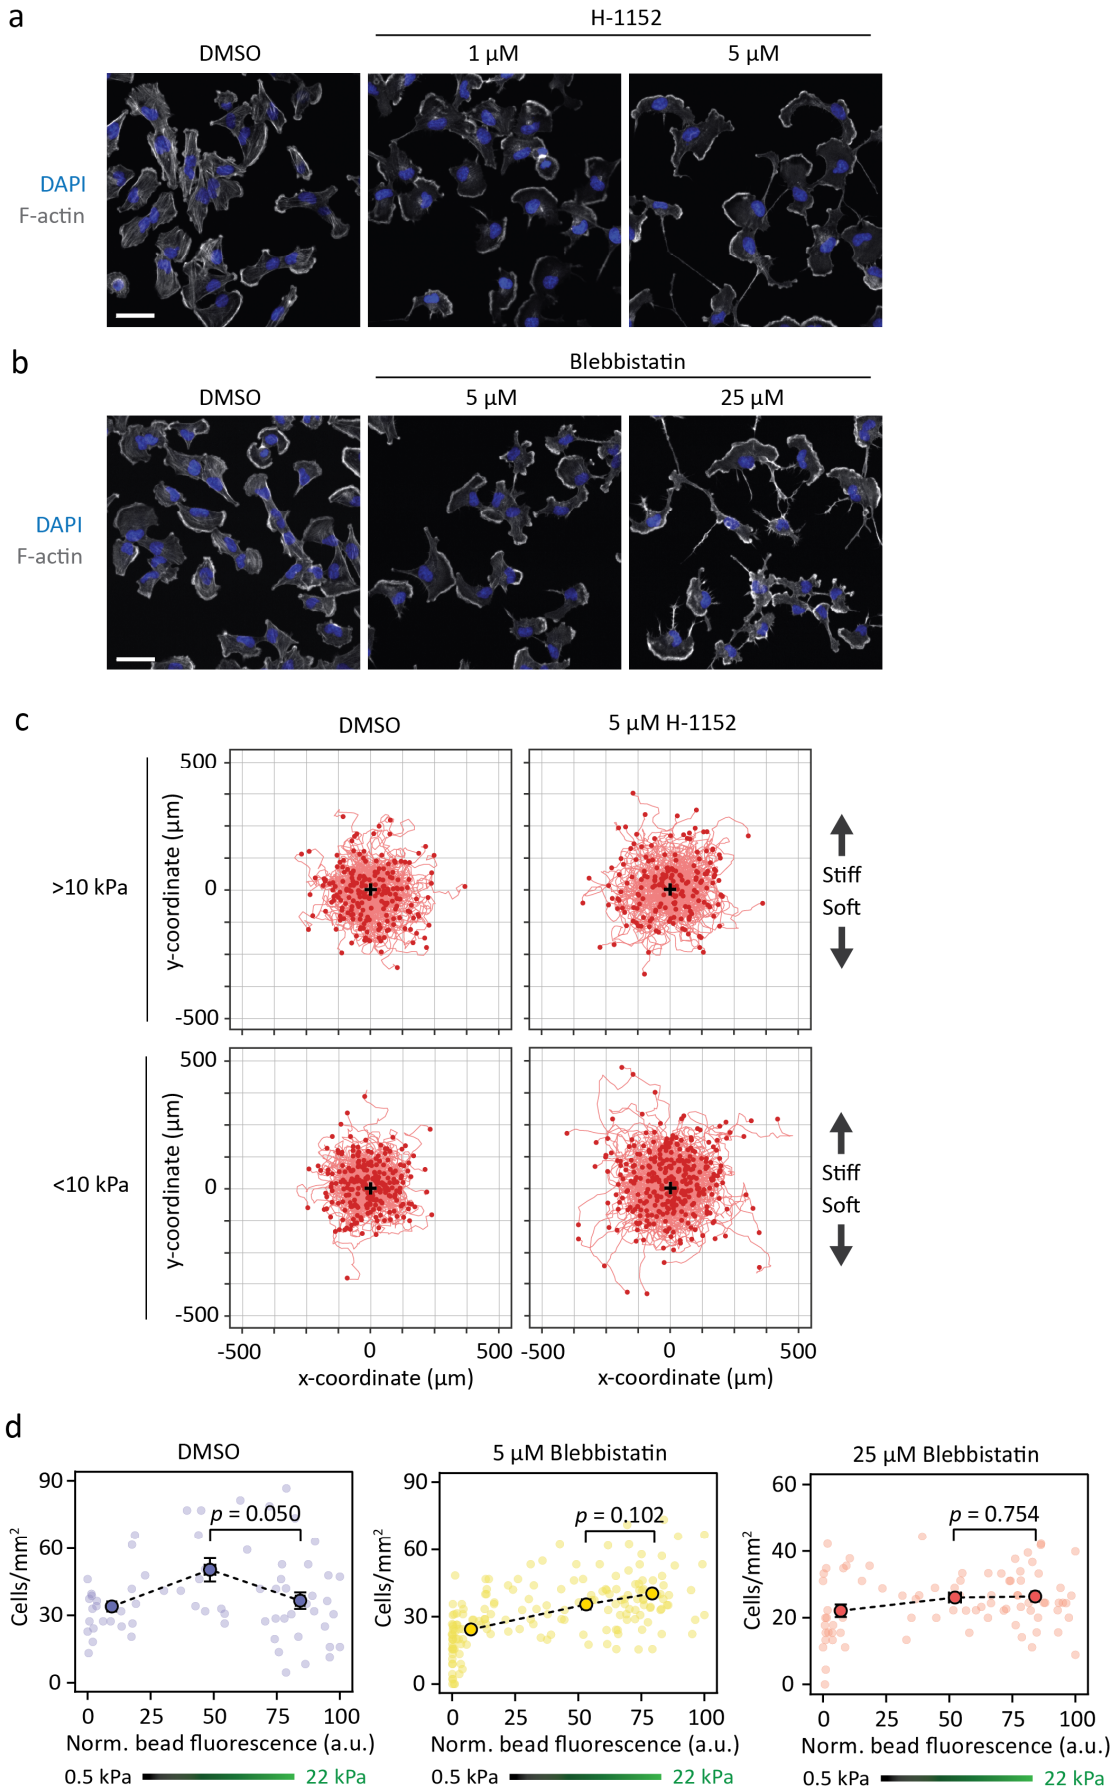

160 Figure S12. Morphology and migration of U-251MG cells during ROCK and myosin II inhibition.  
161 (a–b) Validation of different actomyosin-targeting compounds using U-251MG cells.  
162 Fluorescence images of the actin cytoskeleton after treatment with intermediate and high doses  
163 of ROCK inhibitor H-1152 (a) or myosin II inhibitor blebbistatin (b) for two hours. Scale bar, 50  
164  $\mu\text{m}$ . (c) Tracks from individual U-251MG cells migrating on the stiffer ( $>10$  kPa, top) and softer  
165 ( $<10$  kPa, bottom) regions of a 0.5–22 kPa stiffness gradient for 10 hours, treated with 5  $\mu\text{M}$  H-  
166 1152 or vehicle (DMSO). The tracks correspond to the data in Fig. 4g and each origo (0, 0) is  
167 highlighted by a black (+).  $n = 177\text{--}327$  cells per condition, from one (DMSO) to two (H-1152)  
168 independent experiments. (d) Cell densities in different parts of 0.5–22 kPa gradients, 48 hours  
169 after being seeded and supplemented with varying concentrations of blebbistatin. Mean  $\pm$  SEM  
170 of  $n = 13\text{--}85$  ROIs per bin, from two gradient hydrogels per condition, representative of two  
171 independent experiments. Analyzed by Mann-Whitney test.

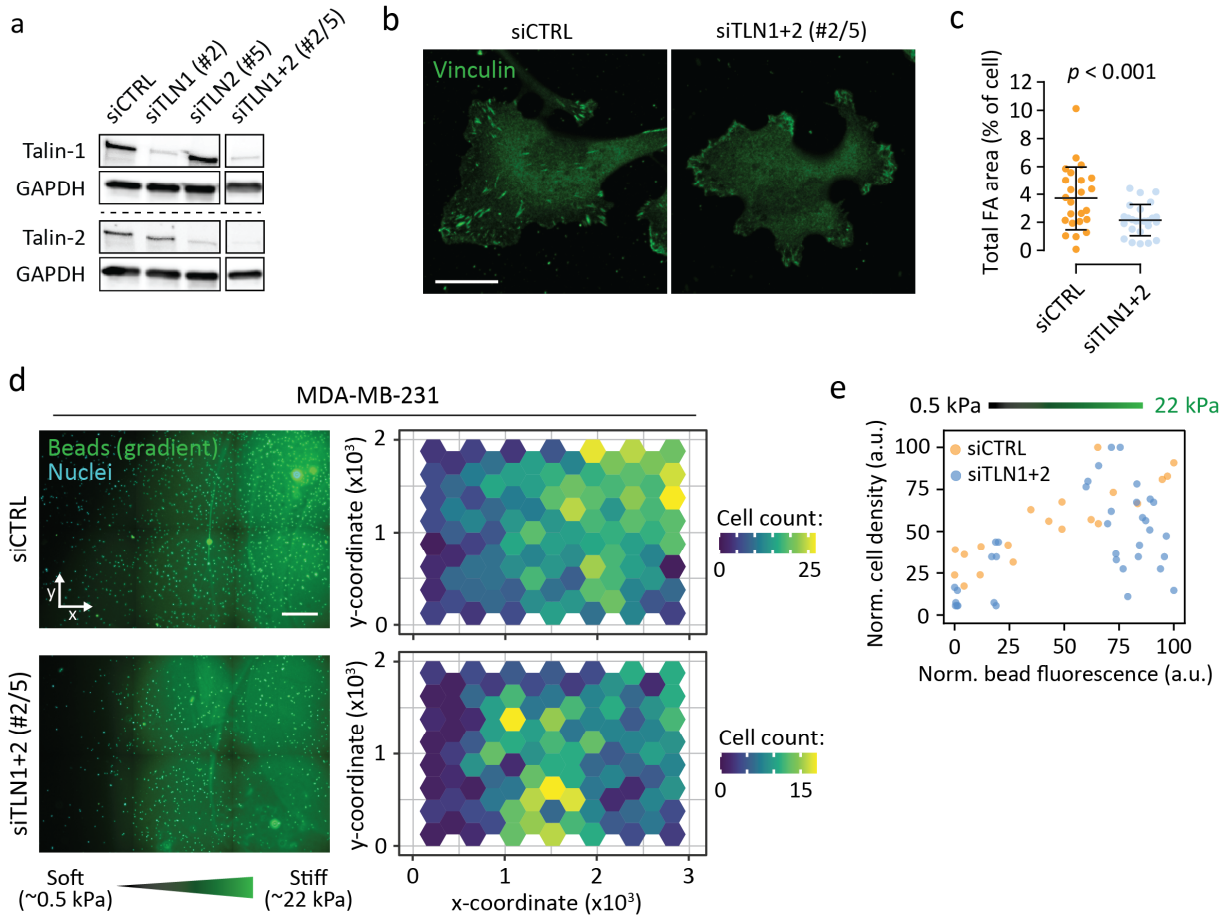

172

173 Figure S13. Additional talin-1/2-targeting siRNAs recapitulate the loss of mature adhesions and  
 174 promote a switch from positive to negative durotaxis in MDA-MB-231 cells. (a) Representative  
 175 western blot depicting talin-1 and talin-2 knockdown in MDA-MB-231 cells using siRNA oligos  
 176 that are different from the ones used in Fig. 5. The fourth band on each row, depicting a double  
 177 knockdown, was cropped from a different site in the same membrane. (b–c)  
 178 Immunofluorescence images (b) and quantification (c) of vinculin-positive focal adhesions in  
 179 MDA-MB-231s on 60 kPa substrate, without and after talin knockdown. Scale bar, 20 μm. Mean  
 180 ± SD of n = 24–25 cells, analyzed by Mann-Whitney test. (d) (Left) Representative regions of two  
 181 0.5–22 kPa polyacrylamide stiffness gradients, 72 hours after being seeded with MDA-MB-231  
 182 cells. Scale bar, 500 μm. (Right) Quantification of cells across the gradients. (e) Relative MDA-MB-  
 183 231 cell densities in different parts of the stiffness gradients. n = 20–36 ROIs, representative of  
 184 two independent experiments.



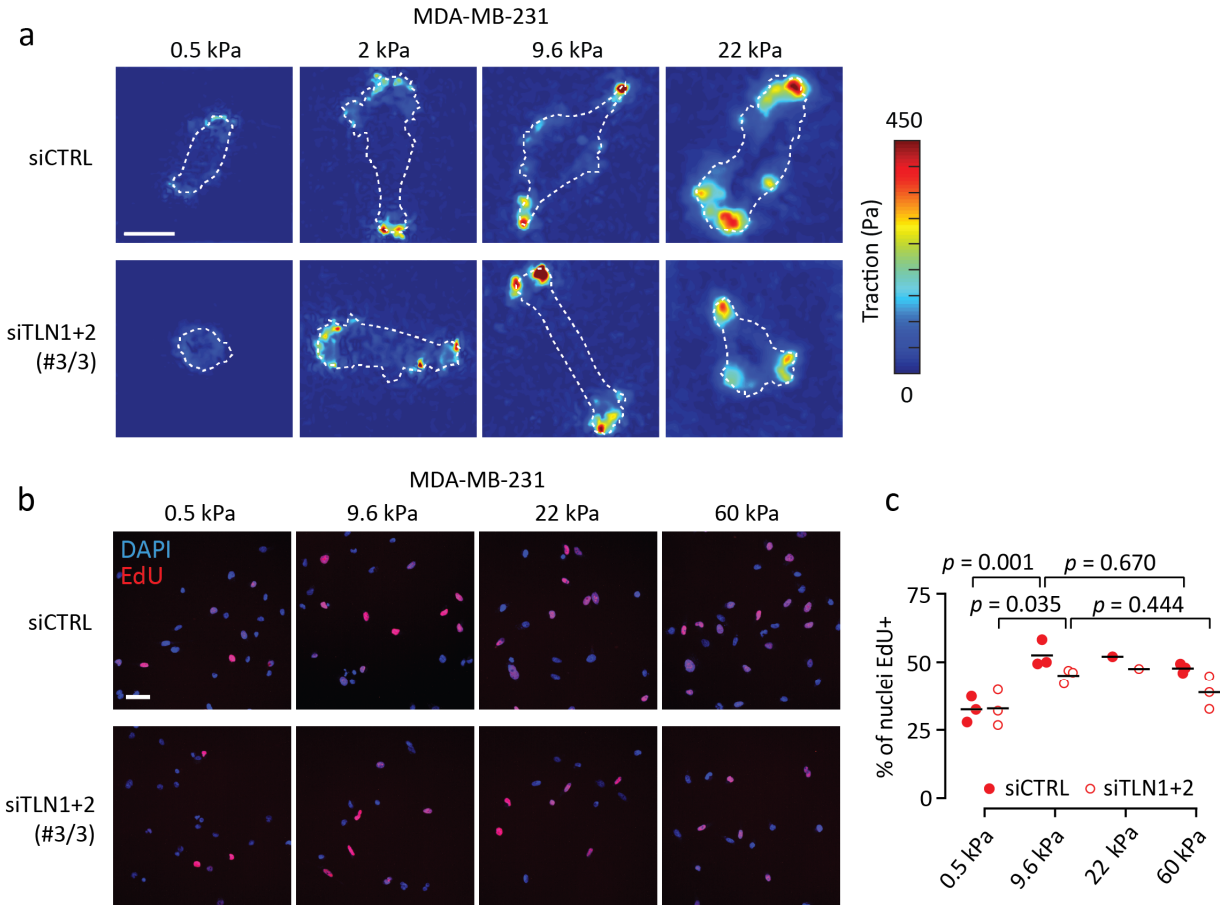

185

186 Figure S14. Mechanosensitive traction and proliferation of MDA-MB-231 cells. (a)  
 187 Representative traction maps from MDA-MB-231 cells on 0.5–22 kPa substrates, corresponding  
 188 to the data in Fig. 5f. Cell outlines are indicated by white dashed lines. Scale bar, 20  $\mu$ m. (b–c)  
 189 Fluorescence images (a) and quantification (b) depicting EdU incorporation by control and talin-  
 190 low MDA-MB-231 cells on 0.5–60 kPa substrates. Scale bar, 50  $\mu$ m. Mean values from one to  
 191 three independent experiments. Analyzed by one-way ANOVA and Sidak's *post hoc* test.

192

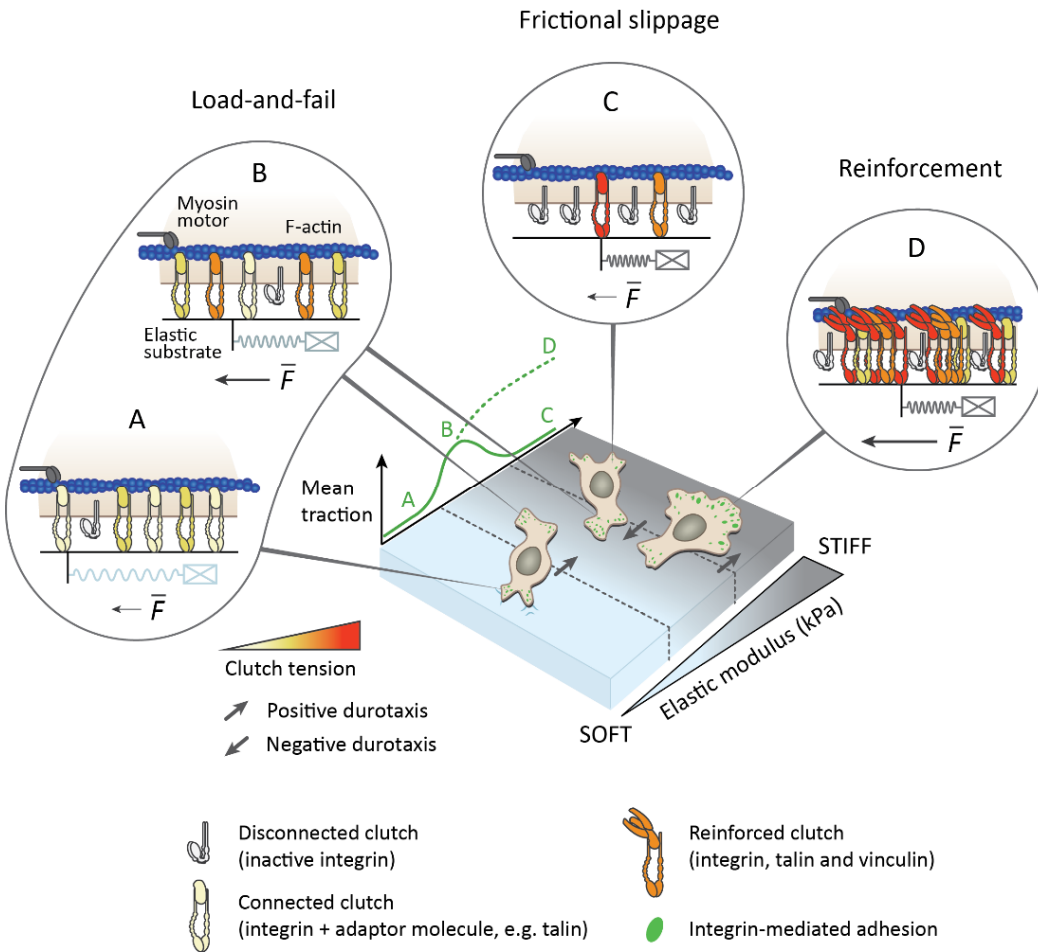

193

194 Figure S15. Schematic representation of the regulation of positive and negative durotaxis by  
 195 motor-clutch dynamics. Cell-intrinsic molecular machinery dictates the cell's capacity to exert  
 196 force on mechanically heterogeneous substrates, driving positive or negative durotaxis. Without  
 197 clutch reinforcement (mechanosensitive FA formation, D), the motor-clutch model predicts a  
 198 biphasic relationship between traction force and substrate stiffness (A–C)<sup>18,19,26–30</sup>. This  
 199 fundamental relationship, and the physical reinforcement of cell-matrix adhesion by FAs, are  
 200 likely to be further influenced by biochemical signaling pathways and feedback loops that  
 201 modulate the expression, activity and localization of individual cytoskeletal and clutch  
 202 components, in a cell type-dependent manner.

203 Supplementary Text 1: Chemistry of o-NBbA and photoresponsive polyacrylamide  
204 hydrogels

205 Polyacrylamide was selected as the base material for the stiffness gradients used in this study, as  
206 it is the most widely employed model system for investigating the role of substrate stiffness in  
207 directing cell behavior. This is partly due to the ease of obtaining elastic moduli in a wide,  
208 physiologically relevant range<sup>51,52</sup>. While other types of gels (e.g. collagen or hyaluronic acid) are  
209 known to interact directly with cell surface receptors, including integrins, polyacrylamide gels are  
210 inert to such interactions. This allows more control over the types and densities of ligands that  
211 will be presented to the cells, making the material ideal for mechanobiological studies. Various  
212 methods have been developed to fabricate stiffness gradients in gels to study the durotactic  
213 behavior of cells. Some examples exploit the diffusion of two prepolymer solutions<sup>13,31</sup>, tilted-  
214 superposition of two hydrogels<sup>53</sup>, freeze-thaw-induced crosslinking of polyvinyl alcohol<sup>54</sup>, or  
215 toehold-mediated strand displacement of DNA<sup>55</sup>. Aiming for high-resolution spatiotemporal  
216 control over the mechanical properties of the gel, we chose light as the external stimulus<sup>56-60</sup>.  
217 Therefore, we aimed to design and synthesize a new, minimalistic and photocleavable crosslinker  
218 that contains acrylate moieties.

219 Among various photolabile functionalities that are available, o-nitrobenzyl (o-NB) was chosen  
220 due to its high one-photon photolysis efficiency and high deprotection yields<sup>61,62</sup>. o-NB based  
221 compounds have been used widely in hydrogel-based studies to achieve controlled release or  
222 immobilization of payloads<sup>63-67</sup>, photodegradation of gels<sup>68-70</sup>, or modulation of gel stiffness<sup>58,71</sup>.  
223 However, many of these studies have focused on polyethylene glycol-based gels rather than  
224 polyacrylamide, or complete degradation of the gel rather than controlling the Young's modulus.  
225 To our knowledge, there has been only one report to date where o-NB-based crosslinkers have  
226 been used to fabricate photoresponsive polyacrylamide hydrogels<sup>72</sup>. While the study  
227 demonstrates the feasibility of o-NB based crosslinking, the method itself requires multiple steps  
228 to crosslink chains of polyacrylamide through the o-NB moiety, which made its application here  
229 unwieldy.

230 In this study, a simple one-step synthesis of photoresponsive polyacrylamide gels was enabled  
231 by the functionalization of an o-NB group with two acrylate moieties to yield a crosslinker that  
232 would cleave upon photolysis. The photocleavable crosslinker, o-nitrobenzyl bis-acrylate (o-  
233 NBbA), was synthesized in seven steps from p-ethyl aniline (Fig. S4a) and designed so that its  
234 cleavage would not release any byproducts in the medium (Fig. S4b). Based on a previously  
235 reported polyacrylamide recipe<sup>46</sup>, a photoresponsive gel with an initial stiffness of 20 kPa that  
236 can be reduced down to 10 kPa was designed by replacing 50 mol % of bis-acrylamide with o-  
237 NBbA. The resulting gel exhibited a Young's modulus of ~15 kPa that was reduced down to ~8  
238 kPa after complete cleavage of the o-NBbA crosslinker by exposure to 395 nm light for 5 min (Fig.

239 S5b–d). The slight discrepancy between the expected and measured substrate stiffness could be  
240 due to the relatively low water solubility and partial phase separation of o-NBbA in the  
241 prepolymer solution, which would result in softening of the hydrogel post-polymerization<sup>73</sup>.

242 The light source used for the photocleavage was an LED from a SpectraX light engine instrument  
243 installed in a Nikon TiE microscope, originally intended for epifluorescence imaging. This method  
244 had several advantages: spatial control can be achieved easily, as the location of the substrate  
245 can be precisely chosen via phase-contrast imaging and the area of irradiation can be controlled  
246 with the field diaphragm and objectives. For instance, the diameter of the LED-irradiated area  
247 could be adjusted to as low as 59  $\mu\text{m}$  using a 40x objective with a nearly closed field diaphragm,  
248 or as high as 978  $\mu\text{m}$  under a 10x objective with a fully opened field diaphragm. Stiffness patterns  
249 could also be created using the ‘time lapse movie’ function of the NIS-Elements software (Nikon).  
250 Here, alternating stiffness gradients were created by initiating a time-lapse movie between two  
251 regions of the gel, a method that could be modified to yield more complex 1D patterns or even  
252 2D shapes. Although not explored here, temporal control would be equally possible: for example,  
253 stiffness gradients could be introduced in gels at various time points during live cell culture, while  
254 simultaneously observing cellular behavior and responses.

255 To conjugate fibronectin to the surface of the gel via covalent interaction, acrylic acid N-  
256 hydroxysuccinimide (NHS) ester was used as the tethering agent. While two methods, addition  
257 of acrylic acid NHS ester in the pregel solution followed by stamping of fibronectin, or stamping  
258 of the pregel solution with fibronectin preincubated with acrylic acid NHS ester, both produced  
259 fibronectin-patterned hydrogels, the former was chosen since it yielded more consistent results.  
260 Once the gel had been fabricated, any remaining NHS ester moieties in the gel were passivated  
261 with bovine serum albumin (BSA) in PBS to prevent any non-specific interactions between the gel  
262 and cells.

263 Supplementary Text 2: Implementation of the cell migration simulator using  
264 mechanically heterogeneous substrates

265 To establish whether our observations of negative (and positive) durotaxis could be explained  
266 through a single set of principles, namely the motor-clutch dynamics of cell-matrix adhesions, we  
267 developed a modified version of the cell migration simulator (CMS) that can be used for modeling  
268 cell migration on mechanically heterogeneous substrates. The detailed governing equations and  
269 algorithms of the original CMS were described previously<sup>29</sup>. Briefly, the CMS comprises multiple  
270 motor-clutch models (i.e. modules) that mimic cellular protrusions found in U-251MG  
271 glioblastoma cells over the stiffness range used in the study. These include multiple lamellipodial  
272 protrusions distributed at the leading edge and around the perimeter of the migrating cell (Fig.  
273 2c, Ref.<sup>29</sup>). Cell motion is determined by a force balance between the modules and a central cell  
274 body (Fig. 3a). In the CMS, new modules are nucleated stochastically, module length increases  
275 over time via actin polymerization that is simultaneously counteracted by myosin-induced  
276 retraction of actin fibers, and modules are removed when they become too short. In addition,  
277 total actin and numbers of clutches and motors are kept constant in accordance with the  
278 conservation of mass.

279 In each motor-clutch system, adhesion clutches bind to elastic substrate springs with a constant  
280 rate of  $k_{on}$ . Connected clutches form a direct mechanical link from the intracellular cytoskeleton  
281 to the extracellular substrate – forces are borne from active myosin motors and transmitted by  
282 the resulting inward actin flow. The unbinding rate of a connected clutch  $i$ ,  $k_{off,i}$ , varies with  
283 force  $F_i$  according to the Bell model<sup>74</sup>:

$$k_{off,i} = k_{off}^* \exp(F_i/F_b) \quad (S1)$$

$$F_i = k_c x_i$$

284 where  $k_{off}^*$  is the clutch unbinding rate in the absence of loading,  $F_b$  is the characteristic clutch  
285 rupture force, and  $x_i$  is the elongation of the spring representing the  $i^{th}$  connected clutch with a  
286 spring constant  $k_c$ . The actin filaments are pulled by  $n_m$  myosin motors, each capable of exerting  
287 a force  $F_m$ , and balanced by the traction force  $F_s$ , resulting in inward actin flow with the effective  
288 actin flow rate ( $v_m$ ) based on

$$v_m = v_m^* \left( 1 - \frac{F_s}{F_{stall}} \right) \quad (S2)$$

289 where  $v_m^*$  is the unloaded rate,  $F_{stall} = n_m F_m$  is the stall force of the ensemble of myosin  
290 motors, and the traction force  $F_s$  transmitted by all the connected clutches is given by:

$$F_s = \sum_{i=1}^{n_{c,on}} F_i \quad (S3)$$

291 in which  $n_{c,on}$  is the number of connected clutch bonds. Actin monomers are added to the  
 292 barbed ends of actin filaments in the cellular protrusions (modules) at a polymerization rate  $v_p$ ,  
 293 constrained by the total actin length  $A_{tot}$  in the cell according to the relation:

$$v_p = v_p^*(A_{free}/A_{tot}) \quad (S4)$$

294 where  $A_{free}$  is the amount of available G-actin and  $v_p^*$  is the maximum polymerization rate.  
 295 Module elongation and retraction both result from this actin polymerization and the actin flow  
 296 rate ( $v_m$ ). New modules are nucleated at a nucleation rate  $k_{mod}$ , also constrained by actin  
 297 availability:

$$k_{mod} = k_{mod}^*(A_{free}/A_{tot}) \quad (S5)$$

298 where  $k_{mod}^*$  is the maximum module nucleation rate. Actin filaments are depolymerized into  
 299 actin monomers when they pass through the position of the myosin motors. Filaments can also  
 300 be capped and polymerization arrested by actin capping proteins at a capping rate  $k_{cap}$ . Actin  
 301 filaments, and the corresponding modules, are removed from the simulation when their length  
 302 falls below  $l_{min}$ .

303 Monte Carlo simulations were conducted using a direct Gillespie Stochastic Simulation  
 304 Algorithm<sup>50</sup>, with each time step determined based on total event rates, including  $k_{on}$ ,  $k_{off,i}$ ,  
 305  $k_{mod}$ , and  $k_{cap}$ , and the event execution determined based on accumulated event rates. The  
 306 CMS C++ version, described in<sup>38</sup>, was modified to account for variations in substrate stiffness  
 307 (described below), and simulations were conducted in Mesabi computer cluster at the Minnesota  
 308 Supercomputing Institute (MSI).

309 After the simulated cells had reached a dynamic steady state (60 min), they were displaced  
 310 randomly to a 180  $\mu\text{m}$  x 180  $\mu\text{m}$  region (Fig. 3b), and the substrate stiffnesses ( $k_s$ ) experienced  
 311 by the cell body and each protrusion were determined based on their respective y-coordinates  
 312 ( $y$ ). The substrate could be either soft ( $k_{soft}$ ), stiff ( $k_{stiff}$ ), or between the two extremes [gradients  
 313 following a normal cumulative distribution function, described by the following error functions  
 314 (erf)]:

$$k_s = k_{soft} \quad -\frac{1}{2}\Delta y_{gradient} - \Delta y_{plateau} < y \leq -\frac{1}{2}\Delta y_{gradient} \quad (S6)$$

$$k_s = k_{soft} + \frac{1}{2}(1 + \text{erf}(4y/\Delta y_{gradient})) (k_{stiff} - k_{soft}) \quad -\frac{1}{2}\Delta y_{gradient} < y \leq \frac{1}{2}\Delta y_{gradient} \quad (S7)$$

$$k_s = k_{stiff} \quad \frac{1}{2}\Delta y_{gradient} < y \leq \frac{1}{2}\Delta y_{gradient} + \Delta y_{plateau} \quad (S8)$$

$$k_s = k_{\text{stiff}} + \frac{1}{2} \left( 1 + \operatorname{erf} \left( 4 \frac{y - \Delta y_{\text{gradient}} - \Delta y_{\text{plateau}}}{\Delta y_{\text{gradient}}} \right) \right) (k_{\text{soft}} - k_{\text{stiff}}) \quad \frac{1}{2} \Delta y_{\text{gradient}} + \Delta y_{\text{plateau}} < y \leq \frac{3}{2} \Delta y_{\text{gradient}} + \Delta y_{\text{plateau}} \quad (\text{S9})$$

315 where  $\Delta y_{\text{gradient}}$  is the width of a region with stiffness gradient (30  $\mu\text{m}$ ) and  $\Delta y_{\text{plateau}}$  is the width  
 316 of a region with constant stiffness (60  $\mu\text{m}$ ). This way, the number of cells in both soft and stiff  
 317 regions was initially the same. In addition, by repeating the same stiffness pattern *ad infinitum*,  
 318 the finite amount of cells placed in the finite rectangular region was representative of infinite  
 319 cells placed on an infinite substrate with the same initial distribution of cells between soft and  
 320 stiff areas. A normal cumulative distribution function was selected due to a finite element model  
 321 of polyacrylamide, which demonstrated that the effective spring constant around a true stepwise  
 322 gradient of elastic modulus follows a similar distribution (Fig. S7). This was valid regardless of the  
 323 orientation of the applied traction (soft-to-stiff vs. stiff-to-soft).

324 Here, we adopted the high-motor-clutch parameter values used previously<sup>29</sup> to describe U-  
 325 251MG migration on mechanically distinct but isotropic substrates (Table S2). Clutch stiffness  
 326 was further adjusted to 8 pN  $\text{nm}^{-1}$  to better recapitulate the stiffness-dependence of U-251MG  
 327 speed *in vitro*<sup>29</sup>. Moreover, the total number of available molecular motors  
 328 ( $N_m$ ) was adjusted between 4,000 and 10,000 to evaluate the impact of actomyosin inhibition on  
 329 the U-251MG stiffness optimum (Fig. 4a–b). During the CMS simulations, cell positions and  
 330 traction forces were recorded every second. The data collected during the first 60 min were  
 331 analyzed to ensure that the simulated cells had indeed reached a dynamic steady state. Random  
 332 motility coefficients (RMC) were calculated as described previously<sup>29</sup>. Briefly, the mean squared  
 333 displacement,  $\langle r^2 \rangle$ , was calculated with overlapping time periods  $\Delta t = 10 \text{ min}, 20 \text{ min}, \dots$ , and  
 334 plotted as a function of  $\Delta t$ . The first half of the plotted curve was fitted with a straight line (slope  
 335 =  $\langle r^2 \rangle / \Delta t$ ), and RMC was given by  $\text{RMC} = \langle r^2 \rangle / 4\Delta t$ . Module forces were recorded every 10 min and  
 336 averaged throughout the simulation to yield the average traction force per module. Custom  
 337 MATLAB scripts were employed to analyze the change in cell numbers in soft and stiff regions  
 338 over time, to compare module forces in the soft and stiff parts of the gradients, and to track  
 339 individual cells over time based on their initial location in soft or graded substrate regions.

340 On 10–100 pN  $\text{nm}^{-1}$  gradients, we found that the majority of cells translocated away from stiffer  
 341 regions and toward soft areas (Fig. 3e–f), which were associated with higher traction forces per  
 342 module and lower overall migration speed, RMC (Fig. 3c–d). We also tested whether altering the  
 343 range of the gradient would affect the durotaxis. On 0.3–3 pN  $\text{nm}^{-1}$  gradients, the stiffer side was  
 344 associated with higher traction forces and higher RMC (Fig. S9a–b). On these substrates,  
 345 simulated cells displayed rapid accumulation in the stiffer regions (Fig. S9c). Finally, when the  
 346 gradient was chosen such that there would be no appreciable difference in mean traction forces  
 347 (100–300 pN  $\text{nm}^{-1}$ ), cells clustered primarily in stiffer regions with lower RMC (Fig. S9a–b,d).

348 In order to track individual cells on stiffness gradients, and to calculate the cells' angular  
 349 displacements and forward migration indices (FMI), 350 cells were simulated on a continuous  
 350 200  $\mu\text{m}$  gradient ranging from 10 to 30 pN  $\text{nm}^{-1}$ . Cells in a dynamic steady state were positioned

351 randomly within an approximately linear 50  $\mu\text{m}$  region in the middle of the gradient (Fig. 3g) and  
352 followed for an additional 14 hours of simulation time. FMIs, defined as  $\Delta y$  divided by the total  
353 track length (accumulated distance), and where positive values denote migration toward  
354 increasing stiffness, indicated that the cells moved preferentially toward the softer side of the  
355 stiffness gradient – in accordance with their predicted stiffness optimum (Fig. 3h–i).



356 Supplementary Text 3: Modeling axonal pathfinding and mechanosensitive steering of  
357 growth cones

358 Axonal growth cones (GCs) (Fig. S10a) can turn or contract in response to substrate stiffness  
359 gradients<sup>24,75</sup> by controlling the dynamics of adhesions, filopodial remodeling, and active  
360 contraction<sup>39</sup>. To establish whether motor-clutch dynamics could explain the mechanosensitive  
361 turning of neuronal GCs<sup>24</sup>, akin to the negative durotaxis exhibited by the U-251MG glioblastoma  
362 cells, we modified the CMS to model an individual GC on a functionally graded substrate. A group  
363 of  $i$  filopodia, each modeled as a single molecular clutch module (Fig. S10b), were attached to a  
364 GC central domain. Each module was allocated  $n_i$  molecular clutches (linear springs of stiffness  
365  $k_c$ ) and  $n_i$  corresponding substrate clutches (linear springs of stiffness  $k_{s,i}$ ). Substrate clutches  
366 were distributed randomly, and had values  $k_{s,1} \leq k_{s,i} \leq k_{s,2}$  that varied linearly with position  
367 along the gradient.

368 Monte Carlo simulations were conducted to evaluate filopodial and GC dynamics over time. We  
369 modeled a GC as having 21 potential growth sites for filopodia, chosen from a uniform orientation  
370 distribution between  $-\pi/2$  and  $\pi/2$ , relative to the direction of the 'axon'. New protrusions with  
371 an initial length  $l_{in}$  and width  $l_{wid}$ , dictating the effective clutch-ligand binding area, were added  
372 into the simulation at a rate  $k_{mod}$  and assigned  $n_m$  myosin motors; note that we used an actin  
373 filament in the schematic diagram (Fig. S11a) to represent the filament bundle in the filopodium.  
374 The adhesion and substrate clutches under each filament then evolved according to the clutch  
375 binding and unbinding dynamics described above. Unlike the cellular level CMS, our modified  
376 model assumes a relatively stable pool of actin monomer in the GC. Thus, the actin  
377 polymerization rate  $v_p$  remained constant during each simulation. See Table S3 for parameter  
378 details.

379 First, we investigated whether the dozens of filopodia within a GC might enable mechanically  
380 directed growth by evaluating the response of an individual 8  $\mu\text{m}$  filopodium to a linear stiffness  
381 gradient of 0.01 to 100  $\text{pN nm}^{-1}$  (Fig. S10b). The filopodium was placed on a 10  $\mu\text{m}$  x 10  $\mu\text{m}$  square  
382 substrate and oriented at an angle  $0 \leq \theta \leq \pi/2$  relative to the gradient (Fig. S10c). When the  
383 filopodium length was fixed, simply increasing the orientation between the filopodium and the  
384 gradient was sufficient to significantly increase traction force generation (Fig. S10d). Conversely,  
385 when the orientation was fixed at  $\pi/2$ , i.e. perpendicular to the gradient, we found that both  
386 traction force and the number of engaged clutches increased linearly with filopodium length (Fig.  
387 S10d).

388 Next, we investigated the impact of different stiffness gradients for traction force generation  
389 using a fixed filopodium length (8  $\mu\text{m}$ ) and orientation (0). Maximal traction forces resulted from  
390 the filopodium sensing a soft region, in the range of 0.01 to 0.1  $\text{pN nm}^{-1}$ . The higher end of the

391 stiffness gradient proved significantly less important for the overall traction (Fig. S10e). This  
392 result demonstrates that a filopodium can generate comparatively high forces even if only a part  
393 of it is located on softer substrate. Thus, high traction force generation by individual filopodia is  
394 favored at a low optimal stiffness and forces drastically drop on stiffer matrices.

395 Higher traction forces are often accompanied by a decrease in actin retrograde flow, as myosin-  
396 borne forces are transmitted to the ECM instead of freely displacing actin. Regardless of filopodia  
397 orientation, actin in GCs flows toward the structure's center, and much like traction forces, actin  
398 flow rates can also differ for different types of neurons<sup>40</sup>. We therefore investigated how both  
399 the speed and direction of actin flow relative to the stiffness gradient affect the dynamics of  
400 single filopodia. By studying filopodia oriented at their growing end with either the stiffer or more  
401 compliant end of a stiffness gradient (Fig. S10f), we found that orientation toward the compliant  
402 end of the substrate (and hence actin retrograde flow toward the stiff end of the substrate) led  
403 to increased extension rates and decreased retraction rates (Fig. S10g). In all cases, the overall  
404 growth rate of filopodia was a trade-off between growth at the constant actin polymerization  
405 rate  $v_p$ , and shortening at the actin flow rate  $v_m$ , which varied almost linearly with substrate  
406 stiffness (Fig. S10h). For an intermediate polymerization rate of  $v_p = 120 \text{ nm s}^{-1}$ , orientation  
407 affected filopodia growth rate by a factor of two (Fig. S10h). Together, these results provide a  
408 mechanism by which individual filopodia can exert more traction and elongate faster on softer  
409 substrates.

410 We then investigated whether these changes in filopodial dynamics could contribute to GC  
411 steering on stiffness gradients. First, we evaluated the degree of GC turning on one type of  
412 stiffness gradient ( $k_{s,1} = 0.01 \text{ pN nm}^{-1}$  and  $k_{s,2} = 100 \text{ pN nm}^{-1}$ ) by studying an initially semicircular  
413 GC with 21 uniformly distributed filopodia (Fig. S11a). Within 15 seconds of simulation, the  
414 filopodia pointing toward the compliant end of the substrate outgrew the rest, resulting in an  
415 effective turning of the GC (Fig. S11a). As expected from the previous results, filopodia in the  
416 softer regions of the gradient were longer and generated higher traction forces (Fig. S11b).

417 To investigate the effect of different stiffness gradients on GC turning in detail, we repeated our  
418 simulations over a broad range of possible substrate stiffnesses, with  $k_{s,left}$  and  $k_{s,right}$  varying  
419 from 0.01 to 100  $\text{pN nm}^{-1}$ . To quantify the degree of turning, we defined a parameter  $\Lambda =$   
420  $\bar{l}_{left}/\bar{l}_{right}$ , which represents the degree to which the GC has turned left. Here,  $\bar{l}_{left}$  and  $\bar{l}_{right}$   
421 are the average lengths of filopodia in the left-hand and right-hand sides of the GC after 100  
422 seconds of simulation, respectively. In addition to developing polarity through turning, the GC  
423 could enlarge, with all filopodia elongating as compared to their initial length, or retract (Fig.  
424 S11c). Enlarged GCs appeared on very compliant substrates (red section,  $k_{s,left}$  and  $k_{s,right}$  on  
425 the order of 0.01 to 0.1  $\text{pN nm}^{-1}$ ) with a negligible stiffness gradient, and retractile GCs appeared  
426 on higher stiffnesses, independent of the actual strength of the gradient (green section,  $k_{s,left}$

427 and  $k_{s,right}$  on the order of 1 to 100 pN nm<sup>-1</sup>). Finally, polarized GCs appeared on compliant  
428 substrates with a moderate or high stiffness gradient ( $k_{s,left}$  on the order of 0.01 to 0.1 pN nm<sup>-1</sup>,  
429 <sup>1</sup>, >1 pN/nm/20 μm). A phase diagram for GC turning illustrates how the structure can either  
430 remain straight or turn to the more compliant side (Fig. S11d), and reveals that a stronger  
431 gradient may also promote GC turning, unless the range of the gradient as a whole is significantly  
432 stiffer than the optimal stiffness range for individual filopodia (Fig. S11e). Thus, the motor-clutch  
433 model can recapitulate mechanosensitive GC steering toward softer matrix *in silico*.

434 Table S1. Relative acrylamide and bis-acrylamide concentrations and corresponding Young's  
 435 moduli for homogeneous (constant modulus) hydrogels

| Final acrylamide % | Final bis-acrylamide % | Volume of (40%) AA stock, $\mu\text{l}$ | Volume of (2%) bis-AA stock, $\mu\text{l}$ | PBS, $\mu\text{l}$ | -Young's modulus, kPa* |
|--------------------|------------------------|-----------------------------------------|--------------------------------------------|--------------------|------------------------|
| 5.4                | 0.04                   | 63                                      | 10                                         | 397                | 0.5                    |
| 5.7                | 0.08                   | 63                                      | 17.5                                       | 365                | 2                      |
| 7.5                | 0.2                    | 94                                      | 50                                         | 356                | 9.6                    |
| 12                 | 0.2                    | 150                                     | 50                                         | 300                | 22                     |
| 18                 | 0.4                    | 225                                     | 100                                        | 175                | 60                     |

436 \*Values obtained using atomic force microscopy, see Ref.<sup>31</sup>

437 Table S2. Parameters for the cellular level CMS

| Parameter                           | Symbol       | Value                 | Ref.                     |
|-------------------------------------|--------------|-----------------------|--------------------------|
| Total number of myosin motors       | $N_m$        | (4,000–)10,000        | <sup>29</sup> , adjusted |
| Total number of clutches            | $N_c$        | 7,500                 | <sup>29</sup>            |
| Maximum total actin length          | $A_{tot}$    | 100 $\mu\text{m}$     | <sup>29</sup>            |
| Maximum actin polymerization rate   | $v_p^*$      | 200 nm/s              | <sup>29</sup>            |
| Maximum module nucleation rate      | $k_{mod}^*$  | 1 $\text{s}^{-1}$     | <sup>29</sup>            |
| Module capping rate                 | $k_{cap}$    | 0.001 $\text{s}^{-1}$ | <sup>29</sup>            |
| Initial module length               | $l_{in}$     | 5 $\mu\text{m}$       | <sup>29</sup>            |
| Minimum module length               | $l_{min}$    | 0.1 $\mu\text{m}$     | <sup>29</sup>            |
| Cell spring constant                | $k_{cell}$   | 10,000 pN/nm          | <sup>29</sup>            |
| Number of cell body clutches        | $n_{c,cell}$ | 10                    | <sup>29</sup>            |
| Substrate spring constant           | $k_s$        | 0.3–300 pN/nm         | Adjusted                 |
| Maximum number of module motors     | $n_m^*$      | 1,000                 | <sup>29</sup>            |
| Myosin motor stall force            | $F_m$        | 2 pN                  | <sup>29</sup>            |
| Unloaded actin flow rate            | $v_m^*$      | 120 nm/s              | <sup>29</sup>            |
| Maximum number of module clutches   | $n_c^*$      | 750                   | <sup>29</sup>            |
| Clutch on-rate                      | $k_{on}$     | 1 $\text{s}^{-1}$     | <sup>29</sup>            |
| Unloaded clutch off-rate            | $k_{off}^*$  | 0.1 $\text{s}^{-1}$   | <sup>29</sup>            |
| Clutch spring constant              | $k_c$        | 8 pN/nm               | Adjusted                 |
| Characteristic clutch rupture force | $F_b$        | 2 pN                  | <sup>29</sup>            |

438

439 Table S3. Parameters for the filopodia/GC model

| Parameter                                | Symbol      | Value                                   | Ref.                       |
|------------------------------------------|-------------|-----------------------------------------|----------------------------|
| Actin polymerization rate                | $v_p$       | 90–130 nm/s                             | <sup>76</sup> , adjusted   |
| Module nucleation rate                   | $k_{mod}$   | 1 s <sup>-1</sup>                       | <sup>29</sup>              |
| Initial filopodium length                | $l_{in}$    | 3 μm                                    | Adapted from <sup>29</sup> |
| Minimum filopodium length                | $l_{min}$   | 0.1 μm                                  | Adapted from <sup>29</sup> |
| Filopodium width for ligand binding      | $l_{wid}$   | 0.2 μm                                  | <sup>77</sup>              |
| Substrate spring constant (soft region)  | $k_{s,1}$   | 10 <sup>-2</sup> –10 <sup>2</sup> pN/nm | Adjusted                   |
| Substrate spring constant (stiff region) | $k_{s,2}$   | 10 <sup>-2</sup> –10 <sup>2</sup> pN/nm | Adjusted                   |
| Initial number of module motors          | $n_m$       | 50                                      | <sup>27</sup>              |
| Myosin motor stall force                 | $F_m$       | 2 pN                                    | <sup>27</sup>              |
| Unloaded actin flow rate                 | $v_m^*$     | 120 nm/s                                | <sup>27</sup>              |
| Initial number of module clutches        | $n_c$       | 50                                      | <sup>27</sup>              |
| Clutch on-rate                           | $k_{on}$    | 0.3 s <sup>-1</sup>                     | <sup>27</sup>              |
| Unloaded clutch off-rate                 | $k_{off}^*$ | 0.1 s <sup>-1</sup>                     | <sup>27</sup>              |
| Clutch spring constant                   | $k_c$       | 1 pN/nm                                 | <sup>27</sup>              |
| Characteristic clutch rupture force      | $F_b$       | 2 pN                                    | <sup>27</sup>              |

440 Captions for Movies S1–S3

441 Movie S1. Evolution of U-251MG glioblastoma cell distribution on photoresponsive stiffness  
 442 gradient hydrogels over time. Blue overlay in the middle denotes a softer, UV-irradiated region.  
 443 Vertical and horizontal lines are out-of-focus markings in the underlying glass. Scale bar, 200 μm.

444 Movie S2. Migration of individual U-251MG cells on photoresponsive stiffness gradient  
 445 hydrogels. (Top) Phase-contrast data showing migrating cells over the span of 24 hours. Scale  
 446 bar, 100 μm. (Bottom) Tracks corresponding to the cells in the top panel. Softer, UV-irradiated  
 447 hydrogel is marked with gray color.

448 [Movie S3. DMSO- and H-1152-treated U-251MG cells migrating on stiffness gradients. Phase-](#)  
 449 [contrast movies of migrating glioma cells treated with 0.1% DMSO \(left\) or 5 μM H-1152 \(right\)](#)  
 450 [for 10 hours. The cells are on continuous 0.5-22 kPa stiffness gradients, in the >10 kPa region](#)  
 451 [\(with substrate stiffness increasing toward the top\). Scale bar, 50 μm.](#)
